# Supplementary material for: Evidence of predictive selective attention in fiddler crabs during escape in the natural environment
Source: Oxford University Press journal article supplement (doi:10.1242/jeb.234963), 2020-11-01
Supplement: jeb234963supp.pdf [file jeb234963supp.pdf]

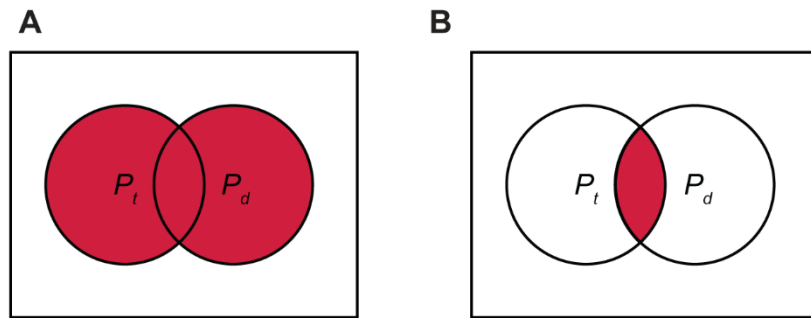

**Figure S1. Venn diagrams.** Venn diagrams illustrate A) probability of the expected combined response  $P(P_d \cup P_t)$  and B) the probability of the crabs that responded to both the direct and the tangential dummy  $P(D_d \cap D_t)$  which used in Eq. 1.

**Table S1.** Results of the generalized linear mixed model analyses for response probability for crabs that are close (< 38 cm) to their direct dummy track (random model: crab identity). Terms included in the final model are shown in bold.

| Comparison           | $N(n)$  | Fixed effects ( $x_i$ ) | Estimate      | d.f | Loglik | $P$    |
|----------------------|---------|-------------------------|---------------|-----|--------|--------|
| Direct vs Tangential | 259(46) | Intercept               | -1.103        | 1   | -      | -      |
|                      |         | <b>Experiment Type</b>  | 1.79 (direct) | 1   | 45.26  | <0.001 |
|                      |         | Crab-burrow distance    | -             | 1   | 1.47   | 0.186  |
| Direct vs paired     | 249(45) | Intercept               | 0.927         | 1   | -      | -      |
|                      |         | Experiment Type         | -             | 1   | 0.13   | 0.613  |
|                      |         | Crab-burrow distance    | -             | 1   | 0.620  | 0.266  |
| Paired vs Tangential | 246(46) | Intercept               | -0.929        | 1   | -      | -      |
|                      |         | <b>Experiment Type</b>  | 1.98 (paired) | 1   | 47.570 | <0.001 |
|                      |         | Crab-burrow distance    | -             | 1   | 0.04   | 0.613  |

**Table S2.** Results of the generalized linear mixed model analyses for response probability for crabs that are far ( $\geq 38$  cm) from their direct dummy track. Random model: crab identity. Terms included in the final model are shown in bold.

| Comparison              | <i>N</i> ( <i>n</i> ) | Fixed effects <sup>b</sup> ( $x_i$ ) | Estimate      | d.f | Loglik | <i>P</i> |
|-------------------------|-----------------------|--------------------------------------|---------------|-----|--------|----------|
| Direct vs<br>Tangential | 196(49)               | Intercept                            | -1.7665       | 1   | -      | -        |
|                         |                       | <b>Experiment Type</b>               | 0.56 (direct) | 1   | 3.6480 | 0.007    |
|                         |                       | Crab-burrow distance                 | -             | 1   | 0.1130 | 0.0536   |
| Direct vs<br>paired     | 207(47)               | Intercept                            | -1.33         | 1   | -      | -        |
|                         |                       | Experiment Type                      | -             | 1   | 0.660  | 0.248    |
|                         |                       | Crab-burrow distance                 | -             | 1   | 1.89   | 0.051    |
| Paired vs<br>Tangential | 202(46)               | Intercept                            | -2.40         | 1   | -      | -        |
|                         |                       | <b>Experiment Type</b>               | 0.68 (paired) | 1   | 5.70   | <0.001   |
|                         |                       | <b>Crab-burrow<br/>distance</b>      | 0.006         | 1   | 1.970  | 0.047    |
